# Supplementary material
Source: PubMed Central journal article supplement (PMC4571016)
Supplement: mmc1.pdf [file mmc1.pdf]

**Biophysical Journal**

**Supporting Material**

**Hydrophobic Surfactant Proteins Strongly Induce Negative Curvature**

Mariya Chavarha,<sup>1,2,3</sup> Ryan W. Loney,<sup>1,2,3</sup> Shankar B. Rananavare,<sup>4</sup> and Stephen B. Hall<sup>1,2,3,\*</sup>

<sup>1</sup>Department of Biochemistry & Molecular Biology, <sup>2</sup>Department of Medicine, and <sup>3</sup>Department of Physiology & Pharmacology, Oregon Health & Science University, Portland, Oregon; and <sup>4</sup>Department of Chemistry, Portland State University, Portland, Oregon

## SUPPORTING INFORMATION

*Additive curvature:* Our analysis requires an expression for the variation of curvature,  $c$ , in response to changes in the concentration of total added protein,  $SP_t$ . Based on studies with different lipids,

$$c = \sum_i c_i \cdot X_i$$

where the  $c_i$  are the intrinsic curvatures for each component of a mixture, and  $X_i$  are their mol fractions. For the binary mixture of lipids combined with the proteins, because the tetradecane fits between the cylindrical monolayers and has no effect on curvature (48),

$$c = c_{PE} \cdot X_{PE} + c_{PC} \cdot X_{PC} + c_{sp} \cdot X_{sp}^b.$$

The sub- and superscripts  $b, f$  and  $t$  refer to bound, free and total moieties, respectively.

For the lipids alone,

$$c_0 \equiv c_{PE} \cdot X_{PE} + c_{PC} \cdot X_{PC}$$

For the small  $X_{sp}$  used here, the  $X_i$  for the lipids are approximately the same with and without the proteins. The change in curvature induced by the proteins,  $\Delta c$ , is given by

$$\Delta c \equiv c - c_0 \approx c_{sp} \cdot X_{sp}^b.$$

$X_{sp}^b = \frac{SP_b}{SP_b + PL_t}$  for concentrations of bound protein,  $SP_b$ , and total phospholipid,  $PL_t$ .

Particularly for molar concentrations,  $SP_b \ll PL_t$ .

$$\therefore X_{sp}^b \approx \frac{SP_b}{PL_t}$$

and

$$\Delta c = c_{sp} \cdot \frac{SP_b}{PL_t}$$

*Langmuir model:* The Langmuir model of binding by the proteins to a limited concentration of discrete sites,  $S$ , provides access to  $SP_b$ . Because  $SP_b = S_b$ ,  $\Delta c$  can be expressed in terms of the fraction of occupied sites,  $\theta \equiv \frac{S_b}{S_t}$ :

$$\Delta c = c_{sp} \cdot \frac{SP_b}{S_t} \cdot \frac{S_t}{PL_t} = c_{sp} \cdot \theta \cdot \frac{SP_b^m}{PL_t} \quad [1]$$

where  $SP_b^m$  is the maximum possible concentration of bound protein. The association constant,  $K_a$ , is given by

$$K_a = \frac{SP_b}{SP_f \cdot S_f} = \frac{S_b}{(SP_t - S_b) \cdot (S_t - S_b)}$$

$$S_b^2 - S_b \cdot \left( S_t + SP_t + \frac{1}{K_a} \right) + SP_t \cdot S_t = 0$$

Solving the quadratic,

$$S_b = \frac{1}{2} \left( S_t + SP_t + \frac{1}{K_a} \right) \cdot \left[ 1 \pm \left( 1 - \frac{4 \cdot SP_t \cdot S_t}{\left( S_t + SP_t + \frac{1}{K_a} \right)^2} \right)^{\frac{1}{2}} \right]$$

A series expansion for  $(1 - x)^{\frac{1}{2}}$  provides the square root. If the ratio,  $x = \frac{4 \cdot SP_t \cdot S_t}{\left( S_t + SP_t + \frac{1}{K_a} \right)^2}$ , is small, the first term of the expansion reasonably approximates the full expression. For  $x$  to be small,  $\left( S_t + SP_t + \frac{1}{K_a} \right)^2 > 4 \cdot SP_t \cdot S_t$ , which requires that the difference between the two terms must be positive.

$$\begin{aligned} \left( S_t + SP_t + \frac{1}{K_a} \right)^2 - 4 \cdot SP_t \cdot S_t &= (S_t + SP_t)^2 + \frac{2(S_t + SP_t)}{K_a} + \frac{1}{K_a^2} - 4 \cdot SP_t \cdot S_t \\ &= (S_t - SP_t)^2 + \frac{2(S_t - SP_t)}{K_a} + \frac{4 SP_t}{K_a} + \frac{1}{K_a} \\ &= \left( S_t - SP_t + \frac{1}{K_a} \right)^2 + \frac{4 SP_t}{K_a} \end{aligned}$$

Because both  $\left( S_t - SP_t + \frac{1}{K_a} \right)^2$  and  $\frac{4 SP_t}{K_a}$  are positive,

$$\left( S_t + SP_t + \frac{1}{K_a} \right)^2 - (4 \cdot SP_t \cdot S_t) > 0$$

$$\left( S_t + SP_t + \frac{1}{K_a} \right)^2 > (4 \cdot SP_t \cdot S_t)$$

$$\therefore x = \frac{4 \cdot SP_t \cdot S_t}{\left( S_t + SP_t + \frac{1}{K_a} \right)^2} < 1.$$

For  $S_t \gg SP_t$ ,  $x \ll 1$ .

Using the expansion  $(1 - x)^{\frac{1}{2}} = 1 - \frac{x}{2}$ ,

$$S_b = \frac{1}{2} \cdot \left( S_t + SP_t + \frac{1}{K_a} \right) \left[ 1 \pm \left( 1 - \frac{2 \cdot SP_t \cdot S_t}{\left( S_t + SP_t + \frac{1}{K_a} \right)^2} \right) \right]$$

$$\begin{aligned}
&= \frac{SP_t \cdot S_t}{S_t + SP_t + \frac{1}{K_a}} && \text{for the root with the negative sign} \\
&= \frac{\epsilon \cdot SP_t}{1 + \epsilon \cdot SP_t} \cdot S_t && \text{for } \epsilon = \frac{K_a}{1 + K_a S_t} \\
\theta &= \frac{S_b}{S_t} = \frac{\epsilon \cdot SP_t}{1 + \epsilon \cdot SP_t}
\end{aligned}$$

For the conditions of our experiments, where  $S_t \gg SP_t$ , the expression for  $\theta$  has the same form as the exact expression of the Langmuir equation,  $\theta = \frac{K_a \cdot SP_f}{1 + K_a \cdot SP_f}$ , but in terms of the concentration of total protein,  $SP_t$ , rather than free, unbound protein,  $SP_f$ , and with  $\epsilon$  replacing  $K_a$ . Note that because  $\epsilon$  depends on  $SP_b^m$  as well as  $K_a$ , changes in the binding capacity as well as the binding affinity would affect how  $\theta$  depends on  $SP_t$ .

From equation [1], these relationships indicate that

$$\Delta c = c_{sp} \cdot \frac{\epsilon \cdot SP_t}{1 + \epsilon \cdot SP_t} \cdot \frac{SP_b^m}{PL_t}$$

For our data,  $\Delta c = \alpha_1 \cdot SP_t \cdot X_{PC}$ .

$$\therefore \Delta c = \frac{a_1 \cdot SP_t}{1 + a_2 \cdot SP_t} \cdot X_{PC}$$

where  $a_1 \cdot X_{PC} = c_{sp} \cdot \epsilon \cdot \frac{SP_b^m}{PL_t}$ ,

$$a_2 = \epsilon,$$

and  $\frac{a_1 \cdot X_{PC}}{a_2} = c_{sp} \cdot \frac{SP_b^m}{PL_t}$
